# Supplementary material
Source: MDPI journal article supplement (https://www.mdpi.com/search?q=ijerph-16-03824)
Supplement: s001 [file ijerph-16-03824-s001.pdf]

## Supplementary Tables

**Table S1. Aggregate decomposition of the change in perceived accessibility to healthcare (excluding the 290 repeated respondents).**

|                                           | Coefficient | Percentage contribution (%) |
|-------------------------------------------|-------------|-----------------------------|
| Accessibility in 2014                     | 0.9668**    |                             |
| Accessibility in 2005                     | 0.8932**    |                             |
| Change in accessibility                   | 0.0735**    |                             |
| <b>Overall contribution to the change</b> |             |                             |
| Distributional effect                     | 0.0471**    | 64                          |
| Coefficient effect                        | 0.0602**    | 82                          |
| Interaction                               | -0.0339**   | -46                         |

Notes: \*\*  $p < 0.001$

**Table S2. Distributional and coefficient effects of explanatory variables on the change in perceived accessibility to healthcare (excluding the 290 repeated respondents)**

| Explanatory variable                                      | Distributional effect |       | Coefficient effect |        | Interaction effect |        |
|-----------------------------------------------------------|-----------------------|-------|--------------------|--------|--------------------|--------|
|                                                           | Coefficient           | %     | Coefficient        | %      | Coefficient        | %      |
| <b>Age (years)</b> (Ref.=“≥85”)                           |                       |       |                    |        |                    |        |
| 65-74                                                     | -0.0001               | -0.21 | 0.0042             | 6.98   | -0.0001            | 0.29   |
| 75-84                                                     | <b>0.0013*</b>        | 2.76  | 0.0022             | 3.65   | 0.0015             | -4.42  |
| <b>Gender</b> (Ref.=Male)                                 |                       |       |                    |        |                    |        |
| Female                                                    | 0.0090                | 19.11 | <b>0.0323*</b>     | 53.65  | -0.0020            | 5.90   |
| <b>Living arrangement</b> (Ref.=With family)              |                       |       |                    |        |                    |        |
| Alone                                                     | <b>-0.0012*</b>       | -2.55 | -0.0004            | -0.66  | -0.0003            | 0.88   |
| In an institution                                         | -0.0003               | -0.64 | -0.0004            | -0.66  | 0.0003             | -0.88  |
| <b>Marital status</b> (Ref.=Married)                      |                       |       |                    |        |                    |        |
| Separated/Divorce                                         | 0.0001                | 0.21  | 0.0002             | 0.33   | -0.0001            | 0.29   |
| Widowed                                                   | -0.0011               | -2.34 | -0.0158            | -26.25 | 0.0045             | -13.27 |
| Never married                                             | 0.0001                | 0.21  | -0.0002            | -0.33  | 0.0001             | -0.29  |
| <b>Years of schooling</b> (Ref.=0)                        |                       |       |                    |        |                    |        |
| 1-5                                                       | 0.0001                | 0.21  | 0.0076             | 12.62  | -0.0003            | 0.88   |
| ≥6                                                        | -0.0003               | -0.64 | 0.0014             | 2.33   | 0.0006             | -1.77  |
| <b>Employment status</b> (Ref.=Unretired)                 |                       |       |                    |        |                    |        |
| Retired                                                   | -0.0001               | -0.21 | -0.0228            | -37.87 | 0.0008             | -2.36  |
| <b>Affordability for daily expenses</b> (Ref.=No)         |                       |       |                    |        |                    |        |
| Yes                                                       | <b>0.0049**</b>       | 10.40 | <b>-0.0116*</b>    | -19.27 | 0.0020             | -5.90  |
| <b>Economic status</b> (Ref.=Very poor)                   |                       |       |                    |        |                    |        |
| Poor                                                      | 0.0039                | 8.28  | -0.0010            | -1.66  | -0.0007            | 2.06   |
| Fair                                                      | <b>0.0113*</b>        | 23.99 | -0.0081            | -13.46 | 0.0014             | -4.13  |
| Rich                                                      | 0.0025                | 5.31  | -0.0016            | -2.66  | -0.0005            | 1.47   |
| Very rich                                                 | 0.0024                | 5.10  | -                  | -6.64  | 0.0032             | -9.44  |
|                                                           |                       |       | <b>0.0040**</b>    |        |                    |        |
| <b>Insurance</b> (Ref.=No)                                |                       |       |                    |        |                    |        |
| One                                                       | <b>0.0104*</b>        | 22.08 | -0.0037            | -6.15  | -0.0164            | 48.38  |
| Two or more                                               | <b>0.0161**</b>       | 34.18 | <b>-0.0085*</b>    | -14.12 | <b>-0.0187*</b>    | 55.16  |
| <b>Out-of-pocket ratio for medical care</b> (Ref.=“≥80%”) |                       |       |                    |        |                    |        |

|                                          |                 |       |                |        |         |        |
|------------------------------------------|-----------------|-------|----------------|--------|---------|--------|
| <40%                                     | <b>0.0056*</b>  | 11.89 | <b>0.0015*</b> | 2.49   | -0.0035 | 10.32  |
| 40%-79%                                  | 0.0011          | 2.34  | 0.0004         | .66    | -0.0067 | 19.76  |
| <b>Region</b> (Ref.=Eastern)             |                 |       |                |        |         |        |
| Central                                  | -0.0011         | -2.34 | 0.0069         | 11.46  | 0.0050  | -14.75 |
| Western                                  | <b>0.0021*</b>  | 4.46  | 0.0016         | 2.66   | -0.0017 | 5.01   |
| <b>Residency</b> (Ref.=Urban)            |                 |       |                |        |         |        |
| Rural                                    | <b>0.0008*</b>  | 1.70  | 0.0270         | 44.85  | 0.0002  | -.59   |
| <b>Hypertension</b> (Ref.=Yes)           |                 |       |                |        |         |        |
| No                                       | 0.0012          | 2.55  | 0.0109         | 18.11  | -0.0020 | 5.90   |
| <b>Diabetes</b> (Ref.=Yes)               |                 |       |                |        |         |        |
| No                                       | 0.0005          | 1.06  | -0.0301        | -50.00 | 0.0033  | -9.73  |
| <b>Heart disease</b> (Ref.=Yes)          |                 |       |                |        |         |        |
| No                                       | 0.0004          | 0.85  | 0.0313         | 51.99  | -0.0017 | 5.01   |
| <b>Self-rated health</b> (Ref.=Very bad) |                 |       |                |        |         |        |
| Bad                                      | -0.0003         | -0.64 | 0.0006         | 1.00   | 0.0001  | -0.29  |
| Fair                                     | <b>0.0031*</b>  | 6.58  | 0.0034         | 5.65   | -0.0011 | 3.24   |
| Good                                     | <b>-0.0018*</b> | -3.82 | 0.0012         | 1.99   | -0.0002 | 0.59   |
| Very good                                | <b>-0.0018*</b> | -3.82 | 0.0027         | 4.49   | -0.0011 | 3.24   |

Note: Figures in bold indicate coefficients with statistical significance \*  $p < 0.05$ ; \*\*  $p < 0.001$
